# Supplementary material for: Population Structure of a Hybrid Clonal Group of Methicillin-Resistant Staphylococcus aureus, ST239-MRSA-III
Source: PLoS One. 2010 Jan 5;5(1):e8582. doi: 10.1371/journal.pone.0008582 (PMC2797301; doi:10.1371/journal.pone.0008582)
Supplement: Table S1 — Characteristics of study isolates. (0.08 MB XLS) [file pone.0008582.s002.xls]

## Sheet: Sheet1
DAR number	Contributor number	Date	Country	Continent	Haplotype	MLST-ST	arc	aro	glp	gmk	pta	tpi	yqi	sasA	sasB	sasD	sasE	sasF	sasH	sasI	rrs1	rrs4	rrs5	rrs6	rrs8	isaA	sbi	glpT	lj2	ggt	lj1	topB	fdhD	hutU	feoB	lj3	left	right	SCCmec type	ccrB3 variant	dru repeats	dru type	Contributor	Reference
DAR1	57/92	1992	Germany	Europe	17	239	2	3	1	1	4	4	3	5	2	4	1	2	4	3	1	1	1	1	1	2	1	4	1	4	2	4	1	5	1	2	1	4	IIIH	2	5a-2d-4a-0-2d-5b-3a-2g-3b-4e	dt10a	MCE	Enright. 2002. PNAS. 99:7687
DAR110	EMRSA-1	1984	UK	Europe	14	239	2	3	1	1	4	4	3	5	2	4	1	2	4	3	1	1	1	1	1	2	1	4	1	4	2	6	1	5	1	2	1	1	III	2	5a-2d-4a-0-2d-2b-2g-3b-4e-3e	dt10d	MCE	Enright. 2002. PNAS. 99:7687
DAR112	EMRSA-11	1988	UK	Europe	13	239	2	3	1	1	4	4	3	5	2	4	1	2	4	3	1	1	1	1	1	2	1	4	1	4	2	4	1	5	1	2	1	1	IIIA	2	5a-2d-4a-0-2d-2g-3b-4e	dt8a	MCE	Enright. 2002. PNAS. 99:7687
DAR117	EMRSA-4	1987	UK	Europe	9	239	2	3	1	1	4	4	3	5	2	4	1	3	4	3	1	1	1	1	2	2	1	4	1	4	2	4	1	5	1	2	1	1	III	2	5a-2d-3c-5b-3a-2g-3b-4e-3e	dt9s	MCE	Enright. 2002. PNAS. 99:7687
DAR120	EMRSA-7	1987	UK	Europe	9	239	2	3	1	1	4	4	3	5	2	4	1	3	4	3	1	1	1	1	2	2	1	4	1	4	2	4	1	5	1	2	1	1	III	2	5a-2d-3c-5b-3a-2g-3b-4e-3e	dt9s	MCE	Enright. 2002. PNAS. 99:7687
DAR122	EMRSA-9	1987	UK	Europe	21	240	2	3	1	1	21	4	3	5	2	4	1	3	4	3	1	1	1	1	1	2	1	4	1	4	2	4	1	5	1	2	1	1	III	2	5a-2d-4a-0-2d-5b-3a-2g-3b-4e-3e	dt11a	MCE	Enright. 2002. PNAS. 99:7687
DAR124	DAR124	?	?	?	8	239	2	3	1	1	4	4	3	5	2	4	1	3	4	3	1	1	1	1	1	3	1	3	2	4	2	4	1	5	1	2	6	1	IIIA	10	5a-2d-3i-0-3c-4f-3a-2g-3b-4e-3e	dt11w	MCE	unpublished
DAR128	Fin75541	1994	Russia	Europe	17	239	2	3	1	1	4	4	3	5	2	4	1	2	4	3	1	1	1	1	1	2	1	4	1	4	2	4	1	5	1	2	1	4	IIIH	2	5a-2d-4a-2k-2a-5b-3a-2g-3b-4e	dt10ac	MCE	Enright. 2002. PNAS. 99:7687
DAR131	Fin98541	1998	Finland	Europe	23	241	2	3	1	1	4	4	30	5	2	4	1	12	4	3	1	1	1	1	2	4	1	4	1	4	3	4	1	5	1	2	1	1	IIID	9	5a-5b-3a-2g-3b-4e-3e	dt7I	MCE	Enright. 2002. PNAS. 99:7687
DAR20	DAR20	?	?	?	12	239	2	3	1	1	4	4	3	5	2	4	1	3	4	3	1	1	1	2	1	2	1	4	1	4	2	4	1	5	3	2	1	1	IIIG	2	5a-2d-4a-0-2d-5b-3a-2g-3b-4e-3e	dt11a	MCE	unpublished
DAR202	Pol1792/97	1997	Poland	Europe	25	157	2	3	26	1	4	39	3	5	2	4	1	2	4	3	1	1	1	1	1	2	3	4	1	4	2	4	1	6	1	2	1	1	III	2	5a-2d-3i-0-2d-5b-4i-2g-3b-4e-3e	dt11s	MCE	Enright. 2002. PNAS. 99:7687
DAR203	PolJ405	1994	Poland	Europe	20	239	2	3	1	1	4	4	3	6	2	4	1	2	4	3	1	1	2	1	1	2	2	4	1	4	2	4	1	6	1	2	1	1	IIIC	2	5a-2d-4a-0-2d-5b-3a-2g-3b-4e-3e	dt11a	MCE	Enright. 2002. PNAS. 99:7687
DAR204	PolMR1065	1992	Poland	Europe	15	239	2	3	1	1	4	4	3	5	2	4	1	2	4	3	1	1	1	1	1	2	1	4	1	4	2	4	1	6	1	2	1	1	IIIC	2	5a-2d-4a-0-2d-5b-3a-4c-3b-4e-3e	dt11u	MCE	Enright. 2002. PNAS. 99:7687
DAR2175	CMRSA-3	?	Canada	North America	22	241	2	3	1	1	4	4	30	5	2	4	1	3	4	3	1	1	1	1	2	4	1	4	1	4	2	4	1	5	1	2	1	1	III	9	5a-5b-3a-2g-3b-4e-3e	dt7I	LM/FT	McDougal. 2003. JCM. 41:5113
DAR221	WW635/93	1993	Germany	Europe	5	239	2	3	1	1	4	4	3	5	2	4	1	3	4	3	1	1	1	1	1	3	1	3	2	4	2	4	1	5	1	2	2	1	IIIA	2	5a-2d-3i-0-3c-4f-3a-2g-3b-4e-3e	dt11w	MCE	Enright. 2002. PNAS. 99:7687
DAR224	Ch-B55	1999	China	Asia	9	239	2	3	1	1	4	4	3	5	2	4	1	3	4	3	1	1	1	1	2	2	1	4	1	4	2	4	1	5	1	2	1	1	III	9	5a-1a-3c-2g-3b	dt5d	JHS	Ko. 2005. JCM. 43:421
DAR225	Ch-B82	1999	China	Asia	10	239	2	3	1	1	4	4	3	5	2	4	1	3	4	3	1	1	1	1	2	2	4	4	1	4	2	4	1	5	1	2	1	1	IIIA	9	6c	dt1a	JHS	Ko. 2005. JCM. 43:421
DAR227	Ch-S73	1999	China	Asia	9	239	2	3	1	1	4	4	3	5	2	4	1	3	4	3	1	1	1	1	2	2	1	4	1	4	2	4	1	5	1	2	1	1	III	9	5a-1a-3c-5b-3a-2g-3b-4e-3e	dt9r	JHS	Ko. 2005. JCM. 43:421
DAR228	I-116	1999	India	Asia	3	239	2	3	1	1	4	4	3	5	2	4	1	3	4	3	1	1	1	1	1	2	1	4	1	4	2	4	1	5	1	2	1	5	III	2	5a-2d-4a-0-3c-5b-3a-2g-3b-4e-3e	dt11v	JHS	Ko. 2005. JCM. 43:421
DAR229	I-123	1999	India	Asia	9	239	2	3	1	1	4	4	3	5	2	4	1	3	4	3	1	1	1	1	2	2	1	4	1	4	2	4	1	5	1	2	1	1	III	2	5a-1a-3c-5b-3a-2g-3b-4e-3e	dt9r	JHS	Ko. 2005. JCM. 43:421
DAR230	IDN-46	1999	Indonesia	Asia	9	239	2	3	1	1	4	4	3	5	2	4	1	3	4	3	1	1	1	1	2	2	1	4	1	4	2	4	1	5	1	2	1	1	III	9	5a-1a-3c-5b-3a-5b-3a-2g-2b-5b-3a-2g-2j-4e-3e	dt15b	JHS	Ko. 2005. JCM. 43:421
DAR231	IDN-137	1999	Indonesia	Asia	9	239	2	3	1	1	4	4	3	5	2	4	1	3	4	3	1	1	1	1	2	2	1	4	1	4	2	4	1	5	1	2	1	1	III	9	5a-1a-3c-5b-3a-5b-3a-2g-2b-5b-3a-2g-2j-4e-3e	dt15b	JHS	Ko. 2005. JCM. 43:421
DAR232	IDN-208	1999	Indonesia	Asia	9	239	2	3	1	1	4	4	3	5	2	4	1	3	4	3	1	1	1	1	2	2	1	4	1	4	2	4	1	5	1	2	1	1	III	9	5a-1a-3c-5b-3a-5b-3a-2g-2b-5b-3a-2g-2j-4e-3e	dt15b	JHS	Ko. 2005. JCM. 43:421
DAR233	SI-6	1999	Singapore	Asia	9	239	2	3	1	1	4	4	3	5	2	4	1	3	4	3	1	1	1	1	2	2	1	4	1	4	2	4	1	5	1	2	1	1	III	9	5a-1a-3c-5b-3a-5b-3a-2g-1a-2g-2j-4e-3e	dt13b	JHS	Ko. 2005. JCM. 43:421
DAR234	SI-45	1999	Singapore	Asia	9	239	2	3	1	1	4	4	3	5	2	4	1	3	4	3	1	1	1	1	2	2	1	4	1	4	2	4	1	5	1	2	1	1	III	9	5a-1a-3c-5b-3a-5b-3a-2g-2b-5b-3a-2g-2j-4e-3e	dt15b	JHS	Ko. 2005. JCM. 43:421
DAR235	SI-56	1999	Singapore	Asia	9	239	2	3	1	1	4	4	3	5	2	4	1	3	4	3	1	1	1	1	2	2	1	4	1	4	2	4	1	5	1	2	1	1	IIIA	9	5a-1a-3c-5b-3a-5b-3a-2g-2j-4e-3e	dt11r	JHS	Ko. 2005. JCM. 43:421
DAR236	SL-18	1999	SriLanka	Asia	9	239	2	3	1	1	4	4	3	5	2	4	1	3	4	3	1	1	1	1	2	2	1	4	1	4	2	4	1	5	1	2	1	1	III	2	5a-1a-3c-5b-3a-2g-3b	dt7p	JHS	Ko. 2005. JCM. 43:421
DAR237	SL-94	1999	SriLanka	Asia	9	239	2	3	1	1	4	4	3	5	2	4	1	3	4	3	1	1	1	1	2	2	1	4	1	4	2	4	1	5	1	2	1	1	III	2	5a-1a-3c-5b-3a-2g-3b-4e-3e	dt9r	JHS	Ko. 2005. JCM. 43:421
DAR2384	DAR2384	1971	Norway	Europe	1	239	2	3	1	1	4	4	3	5	2	4	1	3	4	3	1	1	1	1	1	2	1	4	1	4	2	4	1	5	1	2	1	1	III	2	5a-2d-4a-1b-3c-5b-3a-2g-3b-4e-3e	dt11x	FG	unpublished
DAR2385	DAR2385	1971	Norway	Europe	1	239	2	3	1	1	4	4	3	5	2	4	1	3	4	3	1	1	1	1	1	2	1	4	1	4	2	4	1	5	1	2	1	1	III	2	5a-2d-4a-1b-3c-5b-3a-2g-3b-4e-3e	dt11x	FG	unpublished
DAR2386	DAR2386	1972	Norway	Europe	28	1312	2	3	176	1	4	4	3	5	2	4	1	3	4	3	1	1	1	1	1	2	1	4	1	4	2	4	1	5	1	2	1	1	III	2	5a-2d-4a-1b-3c-2g-3b-4e-3e	dt9u	FG	unpublished
DAR2387	DAR2387	1978	Norway	Europe	1	239	2	3	1	1	4	4	3	5	2	4	1	3	4	3	1	1	1	1	1	2	1	4	1	4	2	4	1	5	1	2	1	1	III	2	5a-2d-4a-1b-3c-5b-3a-2g-3b-4e	dt10ah	FG	unpublished
DAR2388	DAR2388	1981	Norway	Europe	1	239	2	3	1	1	4	4	3	5	2	4	1	3	4	3	1	1	1	1	1	2	1	4	1	4	2	4	1	5	1	2	1	1	IIIA	2	5a-2d-4a-1b-3c-5b-3a-2g-3b-4e	dt10ah	FG	unpublished
DAR2389	DAR2389	1982	Norway	Europe	1	239	2	3	1	1	4	4	3	5	2	4	1	3	4	3	1	1	1	1	1	2	1	4	1	4	2	4	1	5	1	2	1	1	IIIF	2	5a-2d-2d-4a-0-2g-3b-4e	dt8b	FG	unpublished
DAR239	Th-106	1999	Thailand	Asia	9	239	2	3	1	1	4	4	3	5	2	4	1	3	4	3	1	1	1	1	2	2	1	4	1	4	2	4	1	5	1	2	1	1	IIIA	9	5a-1a-3c-5b-3a-2g-3b-4e-3e	dt9r	JHS	Ko. 2005. JCM. 43:421
DAR240	VN-12	1998	Vietnam	Asia	9	239	2	3	1	1	4	4	3	5	2	4	1	3	4	3	1	1	1	1	2	2	1	4	1	4	2	4	1	5	1	2	1	1	III	9	5a-1a-3c-5b-3a-5b-3a-3o-2b-5b-3a-2g-2j-4e-3e	dt15c	JHS	Ko. 2005. JCM. 43:421
DAR241	VN-17	1998	Vietnam	Asia	9	239	2	3	1	1	4	4	3	5	2	4	1	3	4	3	1	1	1	1	2	2	1	4	1	4	2	4	1	5	1	2	1	1	III	9	5a-1a-3c-5b-3a-5b-3a-2g-2b-5b-3a-2g-2j-4e-3e	dt15b	JHS	Ko. 2005. JCM. 43:421
DAR242	VN-167	1999	Vietnam	Asia	9	239	2	3	1	1	4	4	3	5	2	4	1	3	4	3	1	1	1	1	2	2	1	4	1	4	2	4	1	5	1	2	1	1	III	9	5a-1a-3c-5b-3a-5b-3a-2g-2b-5b-3a-2g-2j-4e-3e	dt15b	JHS	Ko. 2005. JCM. 43:421
DAR243	K01-233	2003	Korea	Asia	9	239	2	3	1	1	4	4	3	5	2	4	1	3	4	3	1	1	1	1	2	2	1	4	1	4	2	4	1	5	1	2	1	1	III	9	5a-1a-3c-5b-3a-5b-3a-2g-2b-5b-3a-2g-2j-4e-3e	dt15b	JHS	Ko. 2005. JCM. 43:421
DAR244	K02-409	2003	Korea	Asia	9	239	2	3	1	1	4	4	3	5	2	4	1	3	4	3	1	1	1	1	2	2	1	4	1	4	2	4	1	5	1	2	1	1	IIIA	9	5a-1a-3c-5b-3a-5b-3a-2g-2b-4f-3a-2g-3n-4e-3e	dt15a	JHS	Ko. 2005. JCM. 43:421
DAR245	K03-030	2003	Korea	Asia	9	239	2	3	1	1	4	4	3	5	2	4	1	3	4	3	1	1	1	1	2	2	1	4	1	4	2	4	1	5	1	2	1	1	IIIE	9	5a-1a-3c-5b-3a-5b-3a-2g-2b-5b-3a-2g-2j-4e-3e	dt15b	JHS	Ko. 2005. JCM. 43:421
DAR246	K04-115	2003	Korea	Asia	9	239	2	3	1	1	4	4	3	5	2	4	1	3	4	3	1	1	1	1	2	2	1	4	1	4	2	4	1	5	1	2	1	1	IIIA	9	6c	dt1a	JHS	Ko. 2005. JCM. 43:421
DAR247	K06-003	2003	Korea	Asia	9	239	2	3	1	1	4	4	3	5	2	4	1	3	4	3	1	1	1	1	2	2	1	4	1	4	2	4	1	5	1	2	1	1	III	9	5a-1a-3c-5b-3a-5b-3a-2g-2b-5b-3a-2g-2j-4e-3e	dt15b	JHS	Ko. 2005. JCM. 43:421
DAR248	K07-011	2003	Korea	Asia	9	239	2	3	1	1	4	4	3	5	2	4	1	3	4	3	1	1	1	1	2	2	1	4	1	4	2	4	1	5	1	2	1	1	III	9	5a-1a-3c-5b-3a-5b-3a-2g-2b-5b-3a-2g-2j-4e-3e	dt15b	JHS	Ko. 2005. JCM. 43:421
DAR249	K08-016	2003	Korea	Asia	9	239	2	3	1	1	4	4	3	5	2	4	1	3	4	3	1	1	1	1	2	2	1	4	1	4	2	4	1	5	1	2	1	1	IIIA	9	5a-1a-3c-5b-3a-5b-3a-2g-2b-4f-3a-2g-3n-4e-3e	dt15a	JHS	Ko. 2005. JCM. 43:421
DAR3	91-4990	1991	Holland	Europe	17	239	2	3	1	1	4	4	3	5	2	4	1	2	4	3	1	1	1	1	1	2	1	4	1	4	2	4	1	5	1	2	1	4	IIIH	2	5a-2d-4a-0-2d-5b-3a-2g-4b-4e	dt10h	MCE	Enright. 2002. PNAS. 99:7687
DAR301	AGT120	1998	Argentina	South America	5	239	2	3	1	1	4	4	3	5	2	4	1	3	4	3	1	1	1	1	1	3	1	3	2	4	2	4	1	5	1	2	2	1	IIIA	2	5a-2d-3i-0-3c-4f-3a-2g-3b-4e-3e	dt11w	HDL	Aires de Sousa. 2001. JCM. 39:2197
DAR302	AGT1	1997	Argentina	South America	8	239	2	3	1	1	4	4	3	5	2	4	1	3	4	3	1	1	1	1	1	3	1	3	2	4	2	4	1	5	1	2	6	1	IIIA	2	5a-2d-3i-0-3c-4f-3a-2g-3b-4e-3e	dt11w	HDL	Aires de Sousa. 2001. JCM. 39:2197
DAR303	AGT67	1997	Argentina	South America	8	239	2	3	1	1	4	4	3	5	2	4	1	3	4	3	1	1	1	1	1	3	1	3	2	4	2	4	1	5	1	2	6	1	IIIA	2	5a-2d-3i-0-3c-4f-3a-2g-3b-4e-3e	dt11w	HDL	Aires de Sousa. 2001. JCM. 39:2197
DAR304	ANS46	1982	Australia	Oceania	14	239	2	3	1	1	4	4	3	5	2	4	1	2	4	3	1	1	1	1	1	2	1	4	1	4	2	6	1	5	1	2	1	1	III	2	5a-2d-4a-0-2d-1b-2g-3b-4e-3e	dt10c	HDL	Dubin. 1992. JGM.138:169
DAR305	HU25	1993	Brazil	South America	5	239	2	3	1	1	4	4	3	5	2	4	1	3	4	3	1	1	1	1	1	3	1	3	2	4	2	4	1	5	1	2	2	1	IIIA	2	5a-2d-3i-0-3c-4f-3a-2g-3b-4e-3e	dt11w	HDL	Teixeira. 1995. JCM. 33:2400
DAR306	BRA2	1997	Brazil	South America	5	239	2	3	1	1	4	4	3	5	2	4	1	3	4	3	1	1	1	1	1	3	1	3	2	4	2	4	1	5	1	2	2	1	IIIB	2	5a-2d-3i-0-3c-5d-3a-2g-3b-4e	dt10aa	HDL	Aires de Sousa. 2001. JCM. 39:2197
DAR307	BRA36	1997	Brazil	South America	5	239	2	3	1	1	4	4	3	5	2	4	1	3	4	3	1	1	1	1	1	3	1	3	2	4	2	4	1	5	1	2	2	1	IIIB	2	5a-2d-3i-0-3c-1b-2g-3b-4e-3e	dt10z	HDL	Aires de Sousa. 2001. JCM. 39:2197
DAR308	BZ48	1997	Brazil	South America	5	239	2	3	1	1	4	4	3	5	2	4	1	3	4	3	1	1	1	1	1	3	1	3	2	4	2	4	1	5	1	2	2	1	IIIB	2	5a-2d-3i-0-3c-4f-3a-2g-3b-4e-3e	dt11w	HDL	Aires de Sousa. 2001. JCM. 39:2197
DAR309	CHL1	1997	Chile	South America	5	239	2	3	1	1	4	4	3	5	2	4	1	3	4	3	1	1	1	1	1	3	1	3	2	4	2	4	1	5	1	2	2	1	IIIB	2	5a-2d-3i-0-3c-4f-3a-2g-3b-4e-3e	dt11w	HDL	Aires de Sousa. 2001. JCM. 39:2197
DAR310	CHL99	1998	Chile	South America	5	239	2	3	1	1	4	4	3	5	2	4	1	3	4	3	1	1	1	1	1	3	1	3	2	4	2	4	1	5	1	2	2	1	IIIB	2	5a-2d-3i-0-3c-4f-3a-2g-3b-4e-3e	dt11w	HDL	Aires de Sousa. 2001. JCM. 39:2197
DAR311	CHL151	1998	Chile	South America	5	239	2	3	1	1	4	4	3	5	2	4	1	3	4	3	1	1	1	1	1	3	1	3	2	4	2	4	1	5	1	2	2	1	IIIB	2	5a-2d-3i-0-3c-4f-3a-2g-3b-4e-3e	dt11w	HDL	Aires de Sousa. 2001. JCM. 39:2197
DAR312	CHL117	1998	Chile	South America	6	239	2	3	1	1	4	4	3	5	2	4	1	3	4	3	1	1	1	1	1	3	5	3	2	4	2	4	1	5	1	2	2	1	IIIB	2	5a-2d-3i-0-3c-4f-3a-2g-3b-4e-3e	dt11w	HDL	Aires de Sousa. 2001. JCM. 39:2197
DAR313	CHI59	1998	China	Asia	9	239	2	3	1	1	4	4	3	5	2	4	1	3	4	3	1	1	1	1	2	2	1	4	1	4	2	4	1	5	1	2	1	1	III	9	5a-1a-3c-5b-3a-2g-3b-4e-3e	dt9r	HDL	Aires de Sousa. 2003. JCM. 41:159
DAR314	CHI55	1998	China	Asia	9	239	2	3	1	1	4	4	3	5	2	4	1	3	4	3	1	1	1	1	2	2	1	4	1	4	2	4	1	5	1	2	1	1	III	9	5a-1a-3c-5b-3a-2g-3b-4e-3e	dt9r	HDL	Aires de Sousa. 2003. JCM. 41:159
DAR315	CHI63	1998	China	Asia	9	239	2	3	1	1	4	4	3	5	2	4	1	3	4	3	1	1	1	1	2	2	1	4	1	4	2	4	1	5	1	2	1	1	IIIA	9	5a-1a-3c-5b-3a-2g-3b-4e-3e	dt9r	HDL	Aires de Sousa. 2003. JCM. 41:159
DAR316	CHI61	1998	China	Asia	9	239	2	3	1	1	4	4	3	5	2	4	1	3	4	3	1	1	1	1	2	2	1	4	1	4	2	4	1	5	1	2	1	1	IIIA	9	5a-1a-3c-5b-3a-2g-3b-4e-3e	dt9r	HDL	Aires de Sousa. 2003. JCM. 41:159
DAR317	3HK	2000	Czech Republic	Europe	18	239	2	3	1	1	4	4	3	5	2	4	1	2	4	3	2	2	1	1	1	2	1	4	1	4	2	4	1	5	1	2	1	4	IIIH	2	5a-2d-4a-0-2d-5b-3a-2g-3b-4e	dt10a	HDL	Melter. 2003. JCM. 41:4998
DAR318	2HK	2001	Czech Republic	Europe	18	239	2	3	1	1	4	4	3	5	2	4	1	2	4	3	2	2	1	1	1	2	1	4	1	4	2	4	1	5	1	2	1	4	IIIH	2	5a-2d-4a-0-2d-5b-3a-2g-3b-4e	dt10a	HDL	Melter. 2003. JCM. 41:4998
DAR319	2A8	2001	Czech Republic	Europe	5	239	2	3	1	1	4	4	3	5	2	4	1	3	4	3	1	1	1	1	1	3	1	3	2	4	2	4	1	5	1	2	2	1	IIIA	2	5a-2d-3i-0-3c-4f-3a-2g-3b-4e-3e	dt11w	HDL	Melter. 2003. JCM. 41:4998
DAR320	15A8	2001	Czech Republic	Europe	18	239	2	3	1	1	4	4	3	5	2	4	1	2	4	3	2	2	1	1	1	2	1	4	1	4	2	4	1	5	1	2	1	4	IIIH	2	5a-2d-4a-0-2d-5b-3a-2g-3b-4e	dt10a	HDL	Melter. 2003. JCM. 41:4998
DAR321	6A8	2001	Czech Republic	Europe	24	241	2	3	1	1	4	4	30	5	new	4	1	3	4	3	1	1	1	1	2	4	1	4	1	4	2	4	1	5	1	2	1	1	III	9	5a-5b-3a-2g-3b-4e-3e	dt7I	HDL	Melter. 2003. JCM. 41:4998
DAR322	1A51	2001	Czech Republic	Europe	18	239	2	3	1	1	4	4	3	5	2	4	1	2	4	3	2	2	1	1	1	2	1	4	1	4	2	4	1	5	1	2	1	4	IIIH	2	5a-2d-4a-0-2d-5b-3a-2g-3b-4e	dt10a	HDL	Melter. 2003. JCM. 41:4998
DAR323	DEN907	2001	Denmark	Europe	9	239	2	3	1	1	4	4	3	5	2	4	1	3	4	3	1	1	1	1	2	2	1	4	1	4	2	4	1	5	1	2	1	1	IIIF	9	9a-3a-5b-3a-2g-2b-5b-3a-2g-2j-3a-2f	dt12e	HDL	unpublished
DAR324	GRE4	1998	Greece	Europe	13	239	2	3	1	1	4	4	3	5	2	4	1	2	4	3	1	1	1	1	1	2	1	4	1	4	2	4	1	5	1	2	1	1	IIIA	2	5a-2d-4a-3e	dt4b	HDL	Aires de Sousa. 2003. JCM. 41:2027
DAR325	GRE18	1998	Greece	Europe	13	239	2	3	1	1	4	4	3	5	2	4	1	2	4	3	1	1	1	1	1	2	1	4	1	4	2	4	1	5	1	2	1	1	III	2	5a-2d-4a-1a-1a-3e	dt6h	HDL	Aires de Sousa. 2003. JCM. 41:2027
DAR326	GRE108	1998	Greece	Europe	1	239	2	3	1	1	4	4	3	5	2	4	1	3	4	3	1	1	1	1	1	2	1	4	1	4	2	4	1	5	1	2	1	1	III	2	5a-2d-4a-0-3c-7a-3a-2g-3b-4e-3e	dt11d	HDL	Aires de Sousa. 2003. JCM. 41:2027
DAR327	GRE317	1999	Greece	Europe	19	239	2	3	1	1	4	4	3	5	2	4	1	2	4	3	1	1	1	1	3	2	1	4	1	4	2	4	1	5	1	2	1	1	IIIA	2	5a-2d-4a-3e	dt4b	HDL	Aires de Sousa. 2003. JCM. 41:2027
DAR328	HUSA304	1993	Hungary	Europe	7	239	2	3	1	1	4	4	3	5	2	4	1	3	4	3	1	1	1	1	1	2	1	4	1	5	2	4	5	5	1	3	4	1	III	2	5a-2d-4a-2g-3b-4e-3e	dt7m	HDL	de Lencastre. 1997. CMI. 3:289
DAR330	HU109	1996	Hungary	Europe	17	239	2	3	1	1	4	4	3	5	2	4	1	2	4	3	1	1	1	1	1	2	1	4	1	4	2	4	1	5	1	2	1	4	IIIH	2	5a-2d-4a-0-2d-2g-3b-4e	dt8a	HDL	Oliveira. 2001. JCM.39:574
DAR331	HUR18	1997	Hungary	Europe	17	239	2	3	1	1	4	4	3	5	2	4	1	2	4	3	1	1	1	1	1	2	1	4	1	4	2	4	1	5	1	2	1	4	IIIH	2	5a-2d-4a-0-2d-5b-3a-2g-3b-4e	dt10a	HDL	Oliveira. 2001. JCM.39:574
DAR332	FFP103	1990	Portugal	Europe	2	239	2	3	1	1	4	4	3	5	2	4	1	3	4	3	1	1	1	1	1	2	1	4	1	4	2	4	4	5	1	2	1	1	IIIC	2	5a-2d-4a-0-2d-5b-3a-2g-3b-4e-3e	dt11a	HDL	Aires de Sousa.1998. JCM. 36:2590
DAR333	HSA10	1992	Portugal	Europe	2	239	2	3	1	1	4	4	3	5	2	4	1	3	4	3	1	1	1	1	1	2	1	4	1	4	2	4	4	5	1	2	1	1	IIIC	2	5a-2d-4a-0-2d-5b-3a-2g-3b-4e-3e	dt11a	HDL	Amorim. 2002. MDR.8:301
DAR334	HSA11	1992	Portugal	Europe	5	239	2	3	1	1	4	4	3	5	2	4	1	3	4	3	1	1	1	1	1	3	1	3	2	4	2	4	1	5	1	2	2	1	IIIA	10	5a-2d-3i-0-3c-4f-3a-2g-3b-4e-3e	dt11w	HDL	Amorim. 2002. MDR. 8:301
DAR335	HGSA6	1996	Portugal	Europe	5	239	2	3	1	1	4	4	3	5	2	4	1	3	4	3	1	1	1	1	1	3	1	3	2	4	2	4	1	5	1	2	2	1	IIIA	10	5a-2d-3i-0-3c-4f-3a-2g-3b-4e-3e	dt11w	HDL	Amorim. 2002. MDR.8:301
DAR336	HGSA63	1999	Portugal	Europe	5	239	2	3	1	1	4	4	3	5	2	4	1	3	4	3	1	1	1	1	1	3	1	3	2	4	2	4	1	5	1	2	2	1	IIIA	10	5a-2d-3i-0-3c-4f-3a-2g-3b-4e-3e	dt11w	HDL	Amorim. 2002. MDR.8:301
DAR337	HGSA26	1998	Portugal	Europe	5	239	2	3	1	1	4	4	3	5	2	4	1	3	4	3	1	1	1	1	1	3	1	3	2	4	2	4	1	5	1	2	2	1	IIIE	10	5a-2d-3i-0-3c-4f-3a-2g-3b-4e-3e	dt11w	HDL	Amorim. 2002. MDR. 8:301
DAR338	HDG2	1992	Portugal	Europe	2	239	2	3	1	1	4	4	3	5	2	4	1	3	4	3	1	1	1	1	1	2	1	4	1	4	2	4	4	5	1	2	1	1	IIIB	2	5a-2d-4a-2d-2d-5b-3a-2g-3b-4e-3e	dt11I	HDL	Sanches. 1996. MDR.2:319
DAR339	HSJ216	1997	Portugal	Europe	5	239	2	3	1	1	4	4	3	5	2	4	1	3	4	3	1	1	1	1	1	3	1	3	2	4	2	4	1	5	1	2	2	1	IIIA	10	5a-2d-3i-0-3c-4f-3a-2g-3b-4e-3e	dt11w	HDL	Aires de Sousa.1998. JCM. 36:2590
DAR340	HGSA9	1997	Portugal	Europe	5	239	2	3	1	1	4	4	3	5	2	4	1	3	4	3	1	1	1	1	1	3	1	3	2	4	2	4	1	5	1	2	2	1	IIIA	10	5a-2d-3i-0-3c-4f-3a-2g-3b-4e-3e	dt11w	HDL	Amorim. 2002. MDR.8:301
DAR341	HGSA15	1998	Portugal	Europe	5	239	2	3	1	1	4	4	3	5	2	4	1	3	4	3	1	1	1	1	1	3	1	3	2	4	2	4	1	5	1	2	2	1	IIIA	10	5a-2d-3i-0-3c-4f-3a-2g-3b-4e-3e	dt11w	HDL	Amorim. 2002. MDR.8:301
DAR342	HGSA57	1999	Portugal	Europe	5	239	2	3	1	1	4	4	3	5	2	4	1	3	4	3	1	1	1	1	1	3	1	3	2	4	2	4	1	5	1	2	2	1	IIIA	10	5a-2d-3i-0-3c-4f-3a-2g-3b-4e-3e	dt11w	HDL	Amorim. 2002. MDR.8:301
DAR345	TAW97	1998	China	Asia	5	239	2	3	1	1	4	4	3	5	2	4	1	3	4	3	1	1	1	1	1	3	1	3	2	4	2	4	1	5	1	2	2	1	IIIA	10	5a-3i-0-3c-4f-3a-2g-3b-4e-3e	dt10ad	HDL	Aires de Sousa. 2003. JCM. 41:159
DAR346	TAW219	1998	China	Asia	9	239	2	3	1	1	4	4	3	5	2	4	1	3	4	3	1	1	1	1	2	2	1	4	1	4	2	4	1	5	1	2	1	1	III	11	5a-1a-3c-5b-3a-5b-3a-2g-2b-5b-3a-2g-2j-4e-3e	dt15b	HDL	Aires de Sousa. 2003. JCM. 41:159
DAR347	TAW9	1998	China	Asia	22	241	2	3	1	1	4	4	30	5	2	4	1	3	4	3	1	1	1	1	2	4	1	4	1	4	2	4	1	5	1	2	1	1	IIIA	9	5a-5b-3a-2g-3b-4e-3e	dt7I	HDL	Aires de Sousa. 2003. JCM. 41:159
DAR348	TAW10	1998	China	Asia	22	241	2	3	1	1	4	4	30	5	2	4	1	3	4	3	1	1	1	1	2	4	1	4	1	4	2	4	1	5	1	2	1	1	III	9	5a-5b-3a-2g-3b-4e	dt6i	HDL	Aires de Sousa. 2003. JCM. 41:159
DAR350	TUR27	1996	Turkey	Europe	17	239	2	3	1	1	4	4	3	5	2	4	1	2	4	3	1	1	1	1	1	2	1	4	1	4	2	4	1	5	1	2	1	4	IIIH	2	5a-2d-4a-0-2d-5b-3a-2g-3b-4e	dt10a	HDL	Aires de Sousa. 2003. JCM. 41:3806
DAR351	TUR1	1996	Turkey	Europe	13	239	2	3	1	1	4	4	3	5	2	4	1	2	4	3	1	1	1	1	1	2	1	4	1	4	2	4	1	5	1	2	1	1	III	2	5a-2d-3p-5b-3a-2g-3b-4e-3e	dt9t	HDL	unpublished
DAR352	URU34	1997	Uruguay	South America	8	239	2	3	1	1	4	4	3	5	2	4	1	3	4	3	1	1	1	1	1	3	1	3	2	4	2	4	1	5	1	2	6	1	IIIA	2	5a-2d-3i-0-3c-4f-2a-2g-3b-4e-3e	dt11t	HDL	Aires de Sousa. 2001. JCM. 39:2197
DAR353	URU118	1998	Uruguay	South America	5	239	2	3	1	1	4	4	3	5	2	4	1	3	4	3	1	1	1	1	1	3	1	3	2	4	2	4	1	5	1	2	2	1	IIIA	2	5a-2d-3i-0-3c-4f-3a-2g-3b-4e-3e	dt11w	HDL	Aires de Sousa. 2001. JCM. 39:2197
DAR354	URU116	1998	Uruguay	South America	26	1225	2	3	1	1	4	148	3	5	2	4	1	3	4	3	1	1	1	1	1	2	1	4	1	4	2	4	1	5	1	2	1	1	IIIE	2	5a-2d-4a-1b-3c-4f-3a-2g-3b-4e	dt10ab	HDL	Aires de Sousa. 2001. JCM. 39:2197
DAR355	URU110	1998	Uruguay	South America	26	1225	2	3	1	1	4	148	3	5	2	4	1	3	4	3	1	1	1	1	1	2	1	4	1	4	2	4	1	5	1	2	1	1	III	2	5a-2d-4a-1b-3c-4f-3a-2g-3b-4e	dt10ab	HDL	Aires de Sousa. 2001. JCM. 39:2197
DAR356	R35	1987	USA	North America	13	239	2	3	1	1	4	4	3	5	2	4	1	2	4	3	1	1	1	1	1	2	1	4	1	4	2	4	1	5	1	2	1	1	III	2	5a-2d-4a-0-2d-5b-3a	dt7a	HDL	Dubin. 1991. AAC.35:1661
DAR357	LHH1	1994	USA	North America	16	239	2	3	1	1	4	4	3	5	2	4	1	2	4	3	1	1	1	1	1	2	6	4	1	4	2	6	1	5	1	2	1	1	III	2	5a-2d-4a-0-2d-2b-2g-3b-4e-3e	dt10d	HDL	de Lencastre. 1996. MDR.2:343
DAR369	00594	?	Egypt	Africa	22	241	2	3	1	1	4	4	30	5	2	4	1	3	4	3	1	1	1	1	2	4	1	4	1	4	2	4	1	5	1	2	1	1	IIIA	9	5a-5b-3a-2g-3b-4e-3e	dt7I	LM/FT	unpublished
DAR370	00986	1998	Egypt	Africa	22	241	2	3	1	1	4	4	30	5	2	4	1	3	4	3	1	1	1	1	2	4	1	4	1	4	2	4	1	5	1	2	1	1	IIIA	9	5a-3e	dt2b	LM/FT	unpublished
DAR371	00597	?	Egypt	Africa	22	241	2	3	1	1	4	4	30	5	2	4	1	3	4	3	1	1	1	1	2	4	1	4	1	4	2	4	1	5	1	2	1	1	III	9	5a-5b-3a-2g-3b-4e-3e	dt7I	LM/FT	unpublished
DAR372	00985	1998	Egypt	Africa	22	241	2	3	1	1	4	4	30	5	2	4	1	3	4	3	1	1	1	1	2	4	1	4	1	4	2	4	1	5	1	2	1	1	III	9	5a-5b-3a-2g-3b-4e-3e	dt7I	LM/FT	unpublished
DAR373	00984	1998	Egypt	Africa	27	1116	2	3	153	1	4	4	30	5	2	4	1	3	4	3	1	1	1	1	2	4	1	4	1	4	2	4	1	5	1	2	1	1	III	9	5a-5b-3a-2g-3b-4e-3e	dt7I	LM/FT	unpublished
DAR722	PT394	2005	India	Asia	11	239	2	3	1	1	4	4	3	5	2	4	1	3	4	3	1	1	1	1	2	4	1	4	1	4	2	4	1	5	1	2	1	1	III	9	5a-5b-3a-2g-3b-4e-3e	dt7I	AM	unpublished
DAR725	DAR725	?	India	Asia	11	239	2	3	1	1	4	4	3	5	2	4	1	3	4	3	1	1	1	1	2	4	1	4	1	4	2	4	1	5	1	2	1	1	IIIA	9	5a-5b-3a-2g-3b-4e-3e	dt7I	AM	unpublished
DAR729	P1062	?	India	Asia	3	239	2	3	1	1	4	4	3	5	2	4	1	3	4	3	1	1	1	1	1	2	1	4	1	4	2	4	1	5	1	2	1	5	III	2	5a-2d-4a-0-3c-5b-3a-2g-3b-4e-3e	dt11v	AM	unpublished
DAR737	P1523	2005	India	Asia	4	239	2	3	1	1	4	4	3	5	2	4	1	3	4	3	1	1	1	1	1	5	1	4	1	4	2	4	1	5	1	2	1	5	IIIA	2	5a-2d-4a-0-3c-5b-3a-2g-3b-4e-3e	dt11v	AM	unpublished
DAR762	P1440	2005	India	Asia	9	239	2	3	1	1	4	4	3	5	2	4	1	3	4	3	1	1	1	1	2	2	1	4	1	4	2	4	1	5	1	2	1	1	IIIA	9	5a-1a-3c-5b-3a-5b-3a-5b-3a-2g-2j-4e-3e	dt13c	AM	unpublished
DAR793	P1492	2005	India	Asia	3	239	2	3	1	1	4	4	3	5	2	4	1	3	4	3	1	1	1	1	1	2	1	4	1	4	2	4	1	5	1	2	1	5	III	2	5a-2d-4a-0-3c-5b-3a-2g-3b-4e-3e	dt11v	AM	unpublished
DAR814	B5986	2005	India	Asia	9	239	2	3	1	1	4	4	3	5	2	4	1	3	4	3	1	1	1	1	2	2	1	4	1	4	2	4	1	5	1	2	1	1	III	9	5a-1a-3c-5b-3a-5b-3a-5b-3a-2g-2j-4e-3e	dt13c	AM	unpublished
